# Supplementary material for: Ratchet-free solid-state inertial rotation of a guest ball in a tight tubular host
Source: PubMed Central journal article supplement (PMC5954156; doi:10.1038/s41467-018-04325-2), 2018-05-15
Supplement: 41467_2018_4325_MOESM1_ESM.pdf [file 41467_2018_4325_MOESM1_ESM.pdf]

## Supplementary Information

### Ratchet-free solid-state inertial rotation of a guest ball in a tight tubular host

Taisuke Matsuno, Yusuke Nakai, Sota Sato, Yutaka Maniwa & Hiroyuki Isobe

#### Supplementary Figures

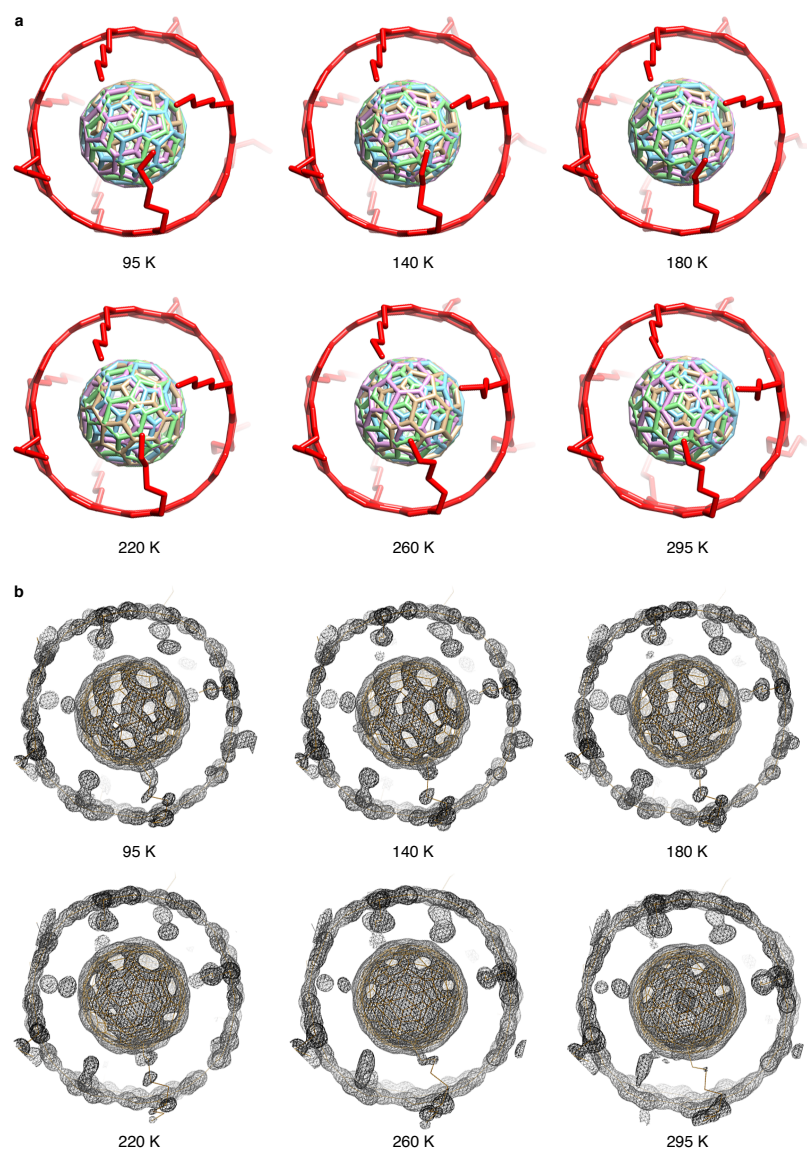

**Supplementary Fig. 1** Crystallographic analyses of (*P*)-(12,8)-[4]CCD-C<sub>60</sub> at 95, 140, 180, 220, 260 and 295 K. **a**, Crystal structures shown in tube models. Four different orientations of C<sub>60</sub> were shown in different colors. Disordered alkyl chains and hydrogen atoms are omitted for clarity. **b**, Electron density mappings with  $2F_o - F_c$  (RMSD:  $1.5\sigma$ ).

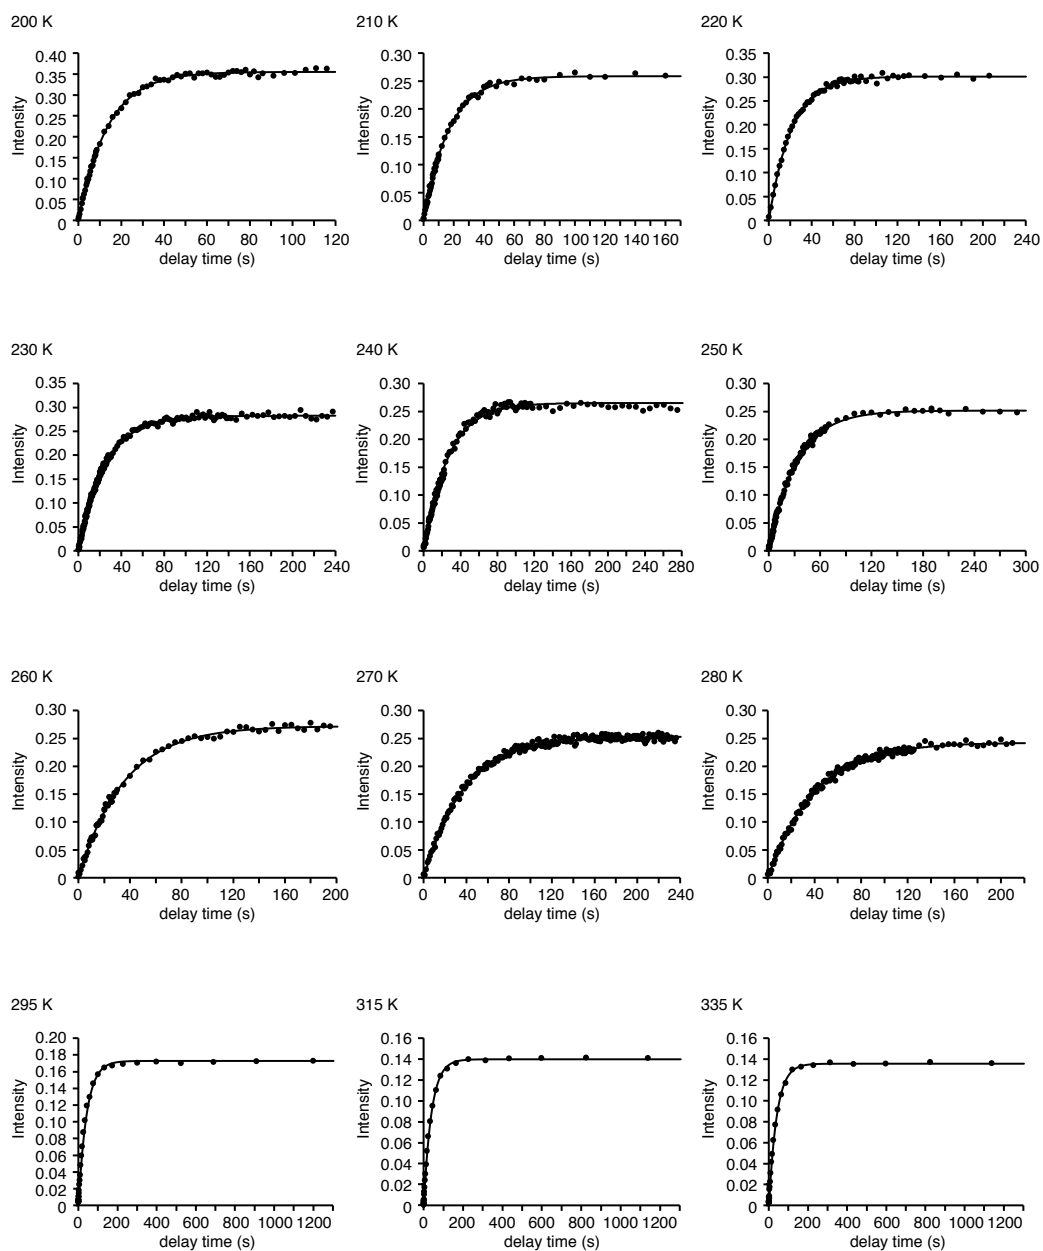

**Supplementary Fig. 2** Raw data of VT  $T_1$  measurements with  $(P)$ -(12,8)-[4]CC $\supset$ C $_{60}$  under 4.01 T.

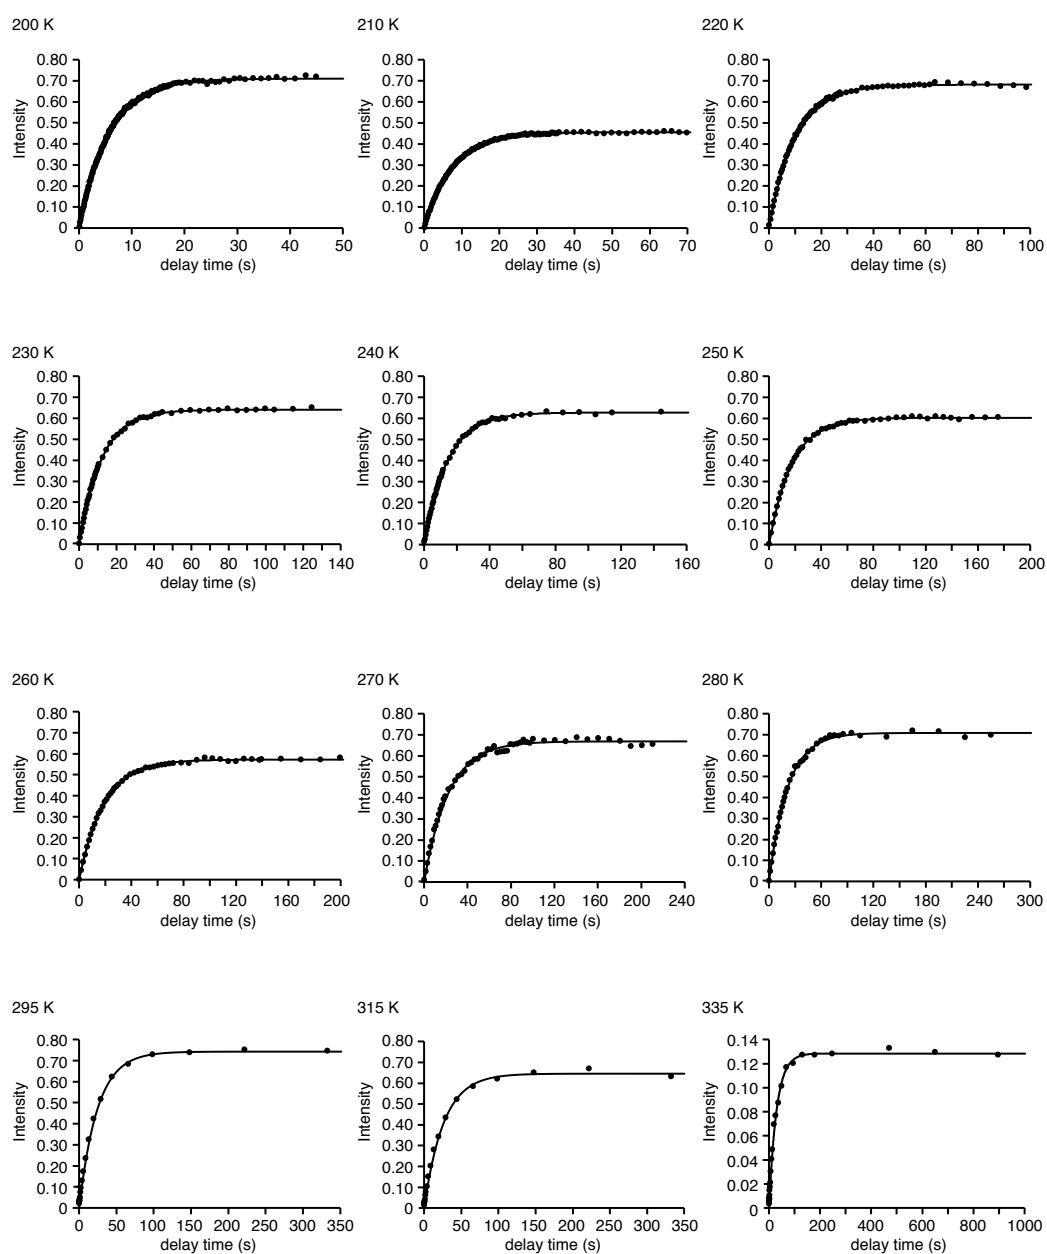

**Supplementary Fig. 3** Raw data of VT  $T_1$  measurements with  $(P)$ -(12,8)-[4]CC $\supset$ C $_60$  under 9.40 T.

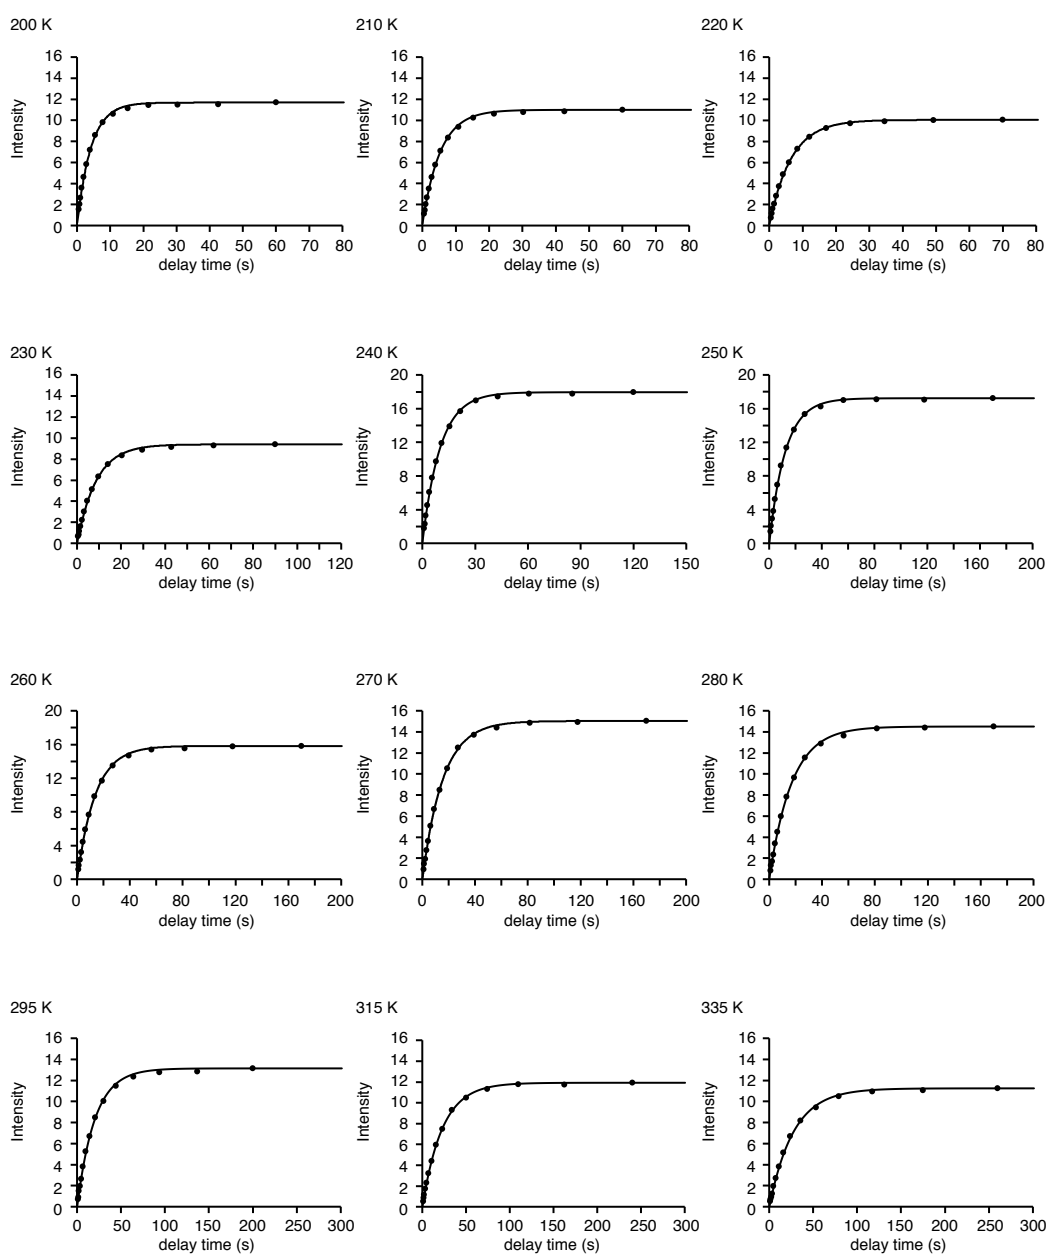

**Supplementary Fig. 4** Raw data of VT  $T_1$  measurements with  $(P)$ -(12,8)-[4]CC $\supset$ C $_{60}$  under 11.7 T.

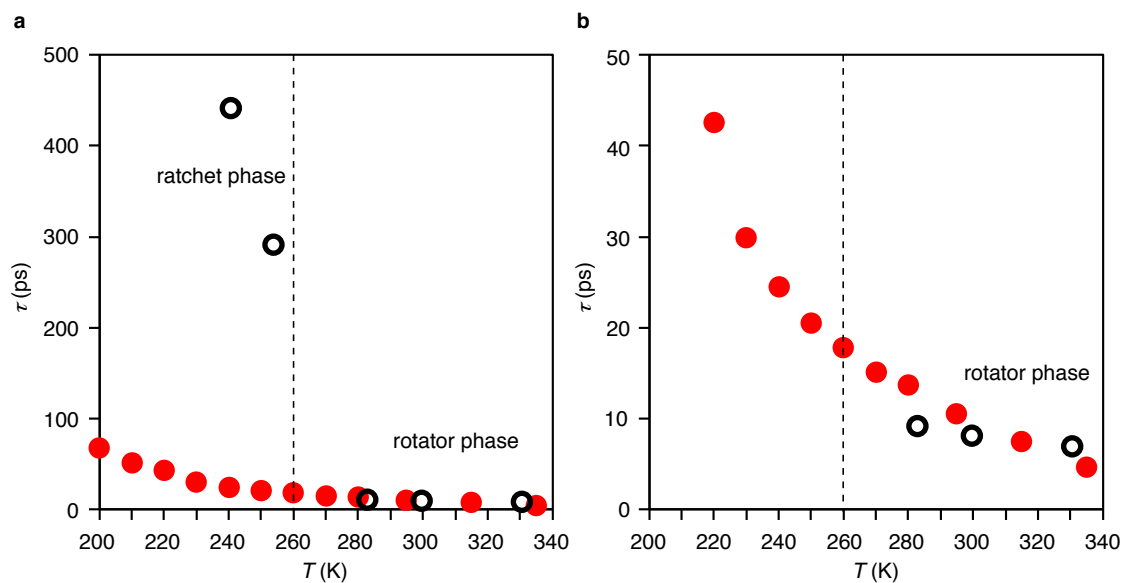

**Supplementary Fig. 5** Comparisons of  $\tau$  values of  $(P)-(12,8)-[4]CC\supset C_{60}$  with those of intact  $C_{60}$ . The data for the intact  $C_{60}$  was taken from the literature<sup>2</sup>. The data of  $(P)-(12,8)-[4]CC\supset C_{60}$  are shown with red filled circles, and the data of  $C_{60}$  are shown in open black circles. **a**, Whole-range data to show the presence of the phase transition (ratchet/rotator) with  $C_{60}$ . **b**, A close-up view to show the absence of phase transition (ratchet/rotator) with  $(P)-(12,8)-[4]CC\supset C_{60}$ .

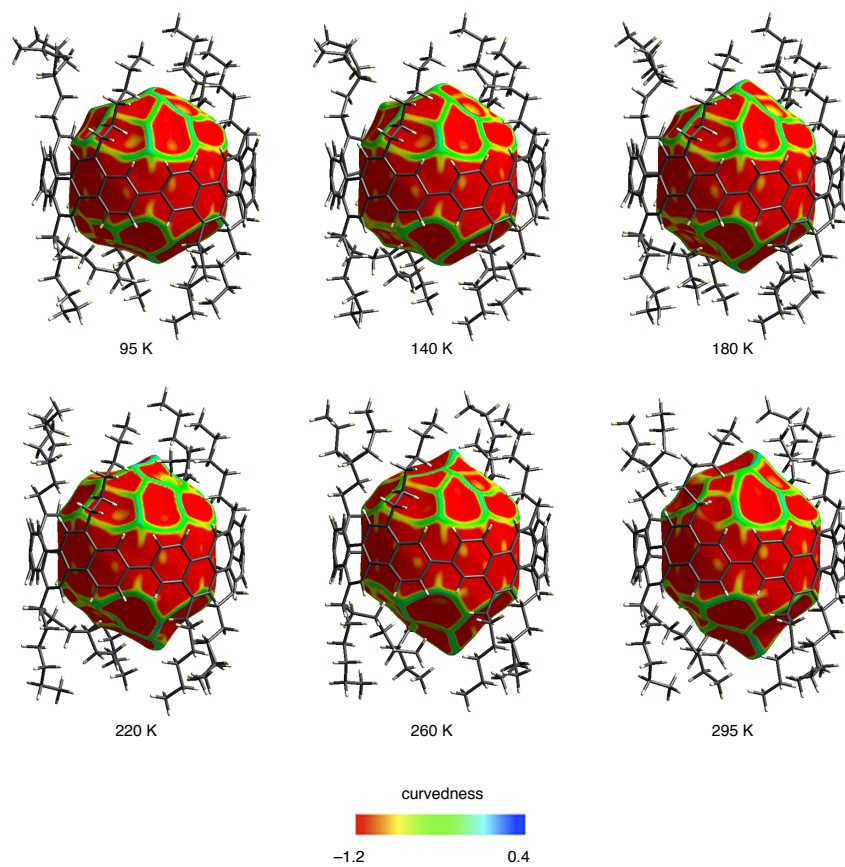

**Supplementary Fig. 6** Hirshfeld surfaces of C<sub>60</sub> in (*P*)-(12,8)-[4]CC mapped with curvedness. No inflection lines were observed (see also ref. 15).

## Supplementary Tables

### Supplementary Table 1 Crystal data and structure refinement at 95 K (CCDC 1821725)

|                                                     |                                                                                                                               |
|-----------------------------------------------------|-------------------------------------------------------------------------------------------------------------------------------|
| Empirical formula                                   | $C_{182.50} H_{141} Cl_5$                                                                                                     |
| Formula weight                                      | 2511.19                                                                                                                       |
| Temperature                                         | 95(2) K                                                                                                                       |
| Wavelength                                          | 0.80000 Å                                                                                                                     |
| Crystal system                                      | Trigonal                                                                                                                      |
| Space group                                         | $P 3_1$                                                                                                                       |
| Unit cell dimensions                                | $a = 28.980(4)$ Å $\alpha = 90^\circ$ .<br>$b = 28.980(4)$ Å $\beta = 90^\circ$ .<br>$c = 13.230(3)$ Å $\gamma = 120^\circ$ . |
| Volume                                              | $9622(3)$ Å <sup>3</sup>                                                                                                      |
| <i>Z</i>                                            | 3                                                                                                                             |
| Density (calculated)                                | 1.300 Mg/m <sup>3</sup>                                                                                                       |
| Absorption coefficient                              | 0.233 mm <sup>-1</sup>                                                                                                        |
| <i>F</i> (000)                                      | 3963                                                                                                                          |
| Crystal size                                        | 0.100 × 0.100 × 0.050 mm <sup>3</sup>                                                                                         |
| Theta range for data collection                     | 1.582 to 28.840°.                                                                                                             |
| Index ranges                                        | $-34 \leq h \leq 34$ , $-34 \leq k \leq 34$ , $-15 \leq l \leq 15$                                                            |
| Reflections collected                               | 113344                                                                                                                        |
| Independent reflections                             | 23472 [ <i>R</i> (int) = 0.0403]                                                                                              |
| Completeness to theta = 28.685°                     | 100.0 %                                                                                                                       |
| Absorption correction                               | Semi-empirical from equivalents                                                                                               |
| Max. and min. transmission                          | 1.000 and 0.686                                                                                                               |
| Refinement method                                   | Full-matrix least-squares on <i>F</i> <sup>2</sup>                                                                            |
| Data / restraints / parameters                      | 23472 / 3225 / 2770                                                                                                           |
| Goodness-of-fit on <i>F</i> <sup>2</sup>            | 2.396                                                                                                                         |
| Final <i>R</i> indices [ <i>I</i> > 2σ( <i>I</i> )] | $R_1 = 0.1213$ , $wR_2 = 0.2931$                                                                                              |
| <i>R</i> indices (all data)                         | $R_1 = 0.1397$ , $wR_2 = 0.3081$                                                                                              |
| Absolute structure parameter                        | 0.024(13)                                                                                                                     |
| Extinction coefficient                              | n/a                                                                                                                           |
| Largest diff. peak and hole                         | 0.370 and -0.461 e.Å <sup>-3</sup>                                                                                            |

**Supplementary Table 2** Crystal data and structure refinement at 140 K (CCDC 1821727)

|                                                     |                                                                                                                               |
|-----------------------------------------------------|-------------------------------------------------------------------------------------------------------------------------------|
| Empirical formula                                   | $C_{182.50} H_{141} Cl_5$                                                                                                     |
| Formula weight                                      | 2511.19                                                                                                                       |
| Temperature                                         | 140(2) K                                                                                                                      |
| Wavelength                                          | 0.80000 Å                                                                                                                     |
| Crystal system                                      | Trigonal                                                                                                                      |
| Space group                                         | $P 3_1$                                                                                                                       |
| Unit cell dimensions                                | $a = 29.080(4)$ Å $\alpha = 90^\circ$ .<br>$b = 29.080(4)$ Å $\beta = 90^\circ$ .<br>$c = 13.330(3)$ Å $\gamma = 120^\circ$ . |
| Volume                                              | 9762(3) Å <sup>3</sup>                                                                                                        |
| <i>Z</i>                                            | 3                                                                                                                             |
| Density (calculated)                                | 1.281 Mg/m <sup>3</sup>                                                                                                       |
| Absorption coefficient                              | 0.230 mm <sup>-1</sup>                                                                                                        |
| <i>F</i> (000)                                      | 3963                                                                                                                          |
| Crystal size                                        | 0.200 × 0.100 × 0.100 mm <sup>3</sup>                                                                                         |
| Theta range for data collection                     | 1.576 to 28.826°.                                                                                                             |
| Index ranges                                        | -34 ≤ <i>h</i> ≤ 35, -35 ≤ <i>k</i> ≤ 35, -16 ≤ <i>l</i> ≤ 16                                                                 |
| Reflections collected                               | 111900                                                                                                                        |
| Independent reflections                             | 23817 [ <i>R</i> (int) = 0.0403]                                                                                              |
| Completeness to theta = 28.685°                     | 100.0 %                                                                                                                       |
| Absorption correction                               | Semi-empirical from equivalents                                                                                               |
| Max. and min. transmission                          | 1.000 and 0.512                                                                                                               |
| Refinement method                                   | Full-matrix least-squares on <i>F</i> <sup>2</sup>                                                                            |
| Data / restraints / parameters                      | 23817 / 3231 / 2770                                                                                                           |
| Goodness-of-fit on <i>F</i> <sup>2</sup>            | 2.924                                                                                                                         |
| Final <i>R</i> indices [ <i>I</i> > 2σ( <i>I</i> )] | <i>R</i> <sub>1</sub> = 0.1394, <i>wR</i> <sub>2</sub> = 0.3425                                                               |
| <i>R</i> indices (all data)                         | <i>R</i> <sub>1</sub> = 0.1505, <i>wR</i> <sub>2</sub> = 0.3524                                                               |
| Absolute structure parameter                        | 0.020(13)                                                                                                                     |
| Extinction coefficient                              | n/a                                                                                                                           |
| Largest diff. peak and hole                         | 0.510 and -0.523 e.Å <sup>-3</sup>                                                                                            |



**Supplementary Table 3** Crystal data and structure refinement at 180 K (CCDC 1821730)

|                                                     |                                                                                                                               |
|-----------------------------------------------------|-------------------------------------------------------------------------------------------------------------------------------|
| Empirical formula                                   | $C_{182.50} H_{141} Cl_5$                                                                                                     |
| Formula weight                                      | 2511.19                                                                                                                       |
| Temperature                                         | 180(2) K                                                                                                                      |
| Wavelength                                          | 0.80000 Å                                                                                                                     |
| Crystal system                                      | Trigonal                                                                                                                      |
| Space group                                         | $P 3_1$                                                                                                                       |
| Unit cell dimensions                                | $a = 29.130(4)$ Å $\alpha = 90^\circ$ .<br>$b = 29.130(4)$ Å $\beta = 90^\circ$ .<br>$c = 13.410(3)$ Å $\gamma = 120^\circ$ . |
| Volume                                              | 9855(3) Å <sup>3</sup>                                                                                                        |
| <i>Z</i>                                            | 3                                                                                                                             |
| Density (calculated)                                | 1.269 Mg/m <sup>3</sup>                                                                                                       |
| Absorption coefficient                              | 0.227 mm <sup>-1</sup>                                                                                                        |
| <i>F</i> (000)                                      | 3963                                                                                                                          |
| Crystal size                                        | 0.200 × 0.200 × 0.100 mm <sup>3</sup>                                                                                         |
| Theta range for data collection                     | 1.574 to 28.825°.                                                                                                             |
| Index ranges                                        | -35 ≤ <i>h</i> ≤ 35, -35 ≤ <i>k</i> ≤ 35, -16 ≤ <i>l</i> ≤ 16                                                                 |
| Reflections collected                               | 111365                                                                                                                        |
| Independent reflections                             | 23996 [ <i>R</i> (int) = 0.0436]                                                                                              |
| Completeness to theta = 28.685°                     | 100.0 %                                                                                                                       |
| Absorption correction                               | Semi-empirical from equivalents                                                                                               |
| Max. and min. transmission                          | 1.000 and 0.447                                                                                                               |
| Refinement method                                   | Full-matrix least-squares on <i>F</i> <sup>2</sup>                                                                            |
| Data / restraints / parameters                      | 23996 / 3239 / 2770                                                                                                           |
| Goodness-of-fit on <i>F</i> <sup>2</sup>            | 2.927                                                                                                                         |
| Final <i>R</i> indices [ <i>I</i> > 2σ( <i>I</i> )] | <i>R</i> <sub>1</sub> = 0.1396, <i>wR</i> <sub>2</sub> = 0.3455                                                               |
| <i>R</i> indices (all data)                         | <i>R</i> <sub>1</sub> = 0.1487, <i>wR</i> <sub>2</sub> = 0.3535                                                               |
| Absolute structure parameter                        | 0.028(17)                                                                                                                     |
| Extinction coefficient                              | n/a                                                                                                                           |
| Largest diff. peak and hole                         | 0.491 and -0.512 e.Å <sup>-3</sup>                                                                                            |

**Supplementary Table 4** Crystal data and structure refinement at 220 K (CCDC 1821728)

|                                                     |                                                                                                                               |
|-----------------------------------------------------|-------------------------------------------------------------------------------------------------------------------------------|
| Empirical formula                                   | $C_{182.50} H_{141} Cl_5$                                                                                                     |
| Formula weight                                      | 2511.19                                                                                                                       |
| Temperature                                         | 220(2) K                                                                                                                      |
| Wavelength                                          | 0.80000 Å                                                                                                                     |
| Crystal system                                      | Trigonal                                                                                                                      |
| Space group                                         | $P 3_1$                                                                                                                       |
| Unit cell dimensions                                | $a = 29.240(4)$ Å $\alpha = 90^\circ$ .<br>$b = 29.240(4)$ Å $\beta = 90^\circ$ .<br>$c = 13.500(3)$ Å $\gamma = 120^\circ$ . |
| Volume                                              | 9996(3) Å <sup>3</sup>                                                                                                        |
| <i>Z</i>                                            | 3                                                                                                                             |
| Density (calculated)                                | 1.252 Mg/m <sup>3</sup>                                                                                                       |
| Absorption coefficient                              | 0.224 mm <sup>-1</sup>                                                                                                        |
| <i>F</i> (000)                                      | 3963                                                                                                                          |
| Crystal size                                        | 0.200 × 0.100 × 0.100 mm <sup>3</sup>                                                                                         |
| Theta range for data collection                     | 1.568 to 28.844°.                                                                                                             |
| Index ranges                                        | -35 ≤ <i>h</i> ≤ 35, -35 ≤ <i>k</i> ≤ 35, -16 ≤ <i>l</i> ≤ 16                                                                 |
| Reflections collected                               | 115877                                                                                                                        |
| Independent reflections                             | 24398 [ <i>R</i> (int) = 0.0507]                                                                                              |
| Completeness to theta = 28.685°                     | 100.0 %                                                                                                                       |
| Absorption correction                               | Semi-empirical from equivalents                                                                                               |
| Max. and min. transmission                          | 1.000 and 0.705                                                                                                               |
| Refinement method                                   | Full-matrix least-squares on <i>F</i> <sup>2</sup>                                                                            |
| Data / restraints / parameters                      | 24398 / 3240 / 2770                                                                                                           |
| Goodness-of-fit on <i>F</i> <sup>2</sup>            | 2.700                                                                                                                         |
| Final <i>R</i> indices [ <i>I</i> > 2σ( <i>I</i> )] | <i>R</i> <sub>1</sub> = 0.1428, <i>wR</i> <sub>2</sub> = 0.3322                                                               |
| <i>R</i> indices (all data)                         | <i>R</i> <sub>1</sub> = 0.1535, <i>wR</i> <sub>2</sub> = 0.3391                                                               |
| Absolute structure parameter                        | 0.07(3)                                                                                                                       |
| Extinction coefficient                              | n/a                                                                                                                           |
| Largest diff. peak and hole                         | 0.359 and -0.396 e.Å <sup>-3</sup>                                                                                            |

**Supplementary Table 5** Crystal data and structure refinement at 260 K (CCDC 1821726)

|                                                     |                                                                                                                               |
|-----------------------------------------------------|-------------------------------------------------------------------------------------------------------------------------------|
| Empirical formula                                   | $C_{182.50} H_{141} Cl_5$                                                                                                     |
| Formula weight                                      | 2511.19                                                                                                                       |
| Temperature                                         | 260(2) K                                                                                                                      |
| Wavelength                                          | 0.80000 Å                                                                                                                     |
| Crystal system                                      | Trigonal                                                                                                                      |
| Space group                                         | $P 3_1$                                                                                                                       |
| Unit cell dimensions                                | $a = 29.320(4)$ Å $\alpha = 90^\circ$ .<br>$b = 29.320(4)$ Å $\beta = 90^\circ$ .<br>$c = 13.540(3)$ Å $\gamma = 120^\circ$ . |
| Volume                                              | $10080(3)$ Å <sup>3</sup>                                                                                                     |
| <i>Z</i>                                            | 3                                                                                                                             |
| Density (calculated)                                | 1.241 Mg/m <sup>3</sup>                                                                                                       |
| Absorption coefficient                              | 0.222 mm <sup>-1</sup>                                                                                                        |
| <i>F</i> (000)                                      | 3963                                                                                                                          |
| Crystal size                                        | 0.200 × 0.200 × 0.100 mm <sup>3</sup>                                                                                         |
| Theta range for data collection                     | 0.903 to 28.851°.                                                                                                             |
| Index ranges                                        | $-35 \leq h \leq 35$ , $-35 \leq k \leq 35$ , $-16 \leq l \leq 16$                                                            |
| Reflections collected                               | 77552                                                                                                                         |
| Independent reflections                             | 21210 [ <i>R</i> (int) = 0.0365]                                                                                              |
| Completeness to theta = 28.685°                     | 99.1 %                                                                                                                        |
| Absorption correction                               | Semi-empirical from equivalents                                                                                               |
| Max. and min. transmission                          | 1.000 and 0.818                                                                                                               |
| Refinement method                                   | Full-matrix least-squares on <i>F</i> <sup>2</sup>                                                                            |
| Data / restraints / parameters                      | 21210 / 3203 / 2770                                                                                                           |
| Goodness-of-fit on <i>F</i> <sup>2</sup>            | 1.145                                                                                                                         |
| Final <i>R</i> indices [ <i>I</i> > 2σ( <i>I</i> )] | $R_1 = 0.1082$ , $wR_2 = 0.2654$                                                                                              |
| <i>R</i> indices (all data)                         | $R_1 = 0.1145$ , $wR_2 = 0.2805$                                                                                              |
| Absolute structure parameter                        | 0.09(5)                                                                                                                       |
| Extinction coefficient                              | n/a                                                                                                                           |
| Largest diff. peak and hole                         | 0.220 and -0.217 e.Å <sup>-3</sup>                                                                                            |

**Supplementary Table 6** Crystal data and structure refinement at 295 K (CCDC 1821729)

|                                                     |                                                                                                                               |
|-----------------------------------------------------|-------------------------------------------------------------------------------------------------------------------------------|
| Empirical formula                                   | $C_{182.50} H_{141} Cl_5$                                                                                                     |
| Formula weight                                      | 2511.19                                                                                                                       |
| Temperature                                         | 295(2) K                                                                                                                      |
| Wavelength                                          | 0.80000 Å                                                                                                                     |
| Crystal system                                      | Trigonal                                                                                                                      |
| Space group                                         | $P 3_1$                                                                                                                       |
| Unit cell dimensions                                | $a = 29.430(4)$ Å $\alpha = 90^\circ$ .<br>$b = 29.430(4)$ Å $\beta = 90^\circ$ .<br>$c = 13.520(3)$ Å $\gamma = 120^\circ$ . |
| Volume                                              | 10141(4) Å <sup>3</sup>                                                                                                       |
| <i>Z</i>                                            | 3                                                                                                                             |
| Density (calculated)                                | 1.234 Mg/m <sup>3</sup>                                                                                                       |
| Absorption coefficient                              | 0.221 mm <sup>-1</sup>                                                                                                        |
| <i>F</i> (000)                                      | 3963                                                                                                                          |
| Crystal size                                        | 0.100 × 0.100 × 0.050 mm <sup>3</sup>                                                                                         |
| Theta range for data collection                     | 1.558 to 28.875°.                                                                                                             |
| Index ranges                                        | -35 ≤ <i>h</i> ≤ 35, -35 ≤ <i>k</i> ≤ 35, -16 ≤ <i>l</i> ≤ 16                                                                 |
| Reflections collected                               | 119096                                                                                                                        |
| Independent reflections                             | 24764 [ <i>R</i> (int) = 0.0341]                                                                                              |
| Completeness to theta = 28.685°                     | 99.9 %                                                                                                                        |
| Absorption correction                               | Semi-empirical from equivalents                                                                                               |
| Max. and min. transmission                          | 1.000 and 0.741                                                                                                               |
| Refinement method                                   | Full-matrix least-squares on <i>F</i> <sup>2</sup>                                                                            |
| Data / restraints / parameters                      | 24764 / 3246 / 2770                                                                                                           |
| Goodness-of-fit on <i>F</i> <sup>2</sup>            | 1.985                                                                                                                         |
| Final <i>R</i> indices [ <i>I</i> > 2σ( <i>I</i> )] | <i>R</i> <sub>1</sub> = 0.1209, <i>wR</i> <sub>2</sub> = 0.2711                                                               |
| <i>R</i> indices (all data)                         | <i>R</i> <sub>1</sub> = 0.1498, <i>wR</i> <sub>2</sub> = 0.2924                                                               |
| Absolute structure parameter                        | 0.07(2)                                                                                                                       |
| Extinction coefficient                              | n/a                                                                                                                           |
| Largest diff. peak and hole                         | 0.359 and -0.262 e.Å <sup>-3</sup>                                                                                            |
